# Supplementary material for: Sensory and decision-making processes underlying perceptual adaptation
Source: PubMed Central journal article supplement (PMC6108310; doi:10.1167/18.8.10), 2018-08-22
Supplement: jovi-18-08-05_s01.pdf [file jovi-18-08-05_s01.pdf]

## Supplementary information

### Supplementary figure 1. Related to figure 1.

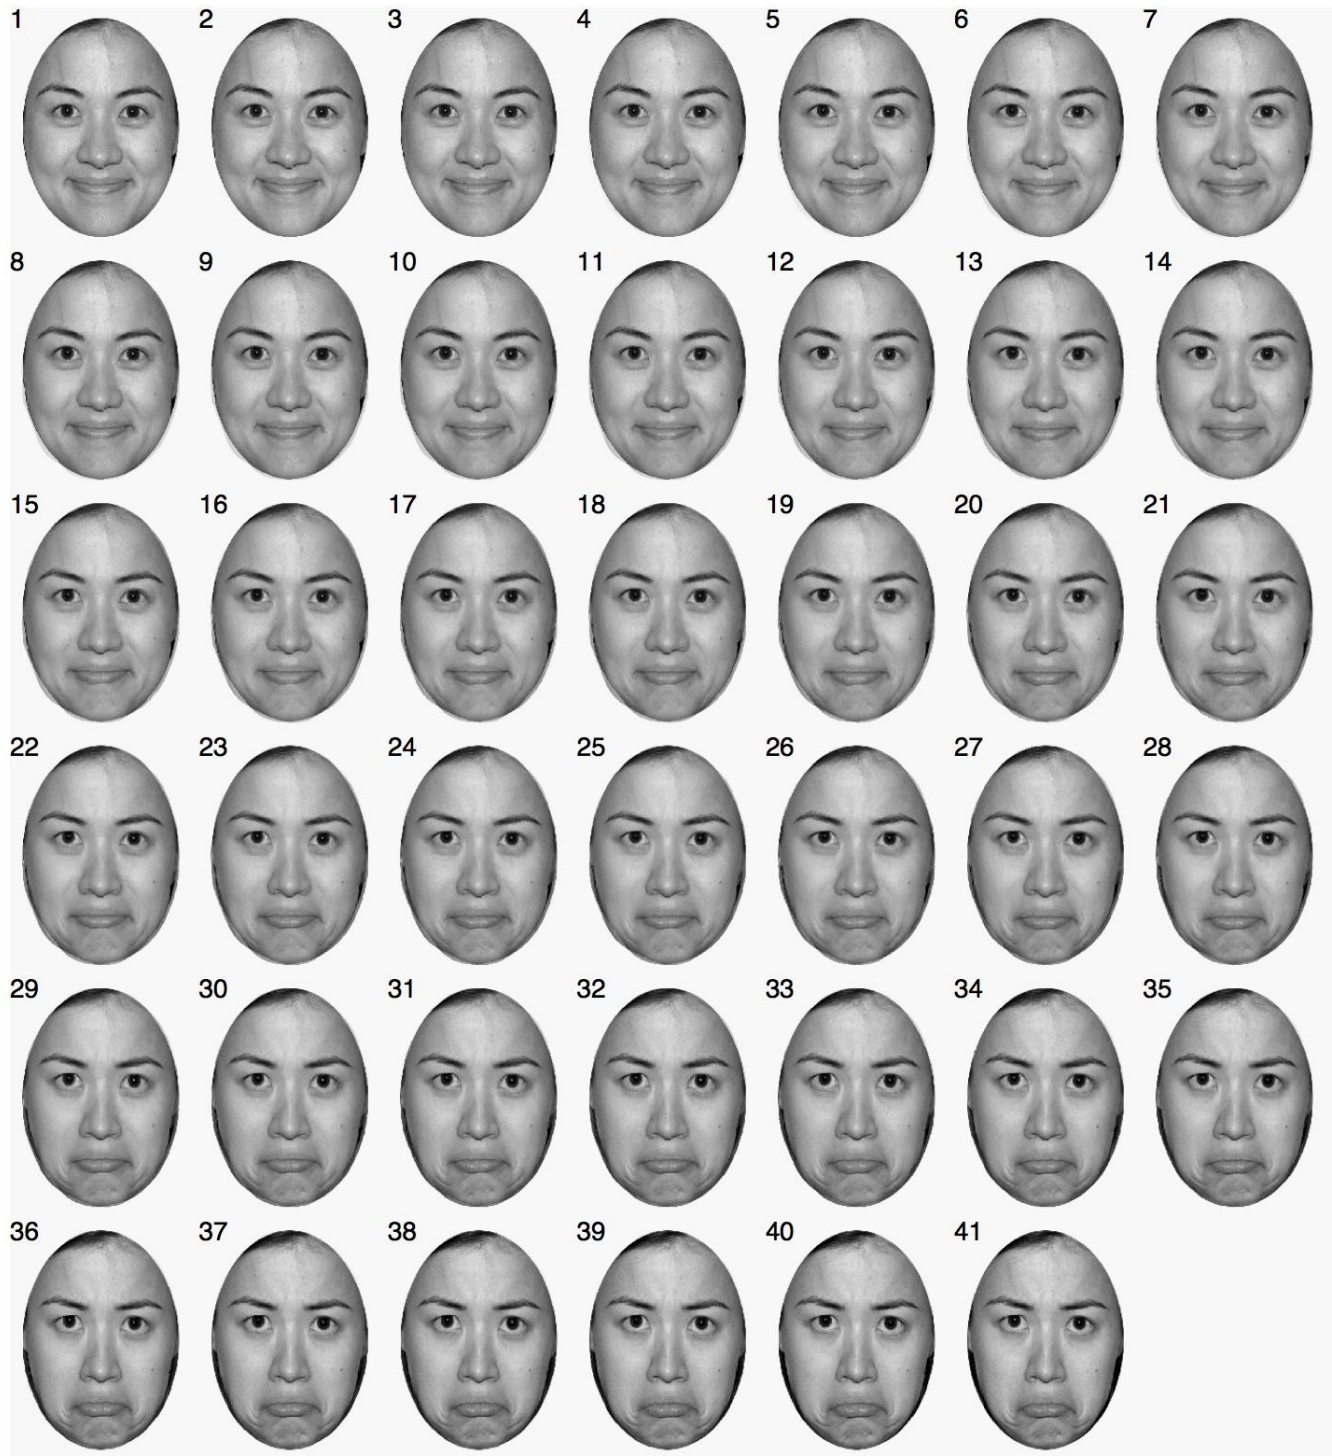

**Figure S1.** The 41 stimuli defining the morph line. The stimuli range from happy (upper left, stimulus strength 0) to sad (lower right, stimulus strength 1), in equal physical steps along the morph trajectory, increasing first from left to right, and then top to bottom. The two endpoints were used as adapting stimuli.

## Supplementary figure 2. Related to figure 4.

### A. Behavior

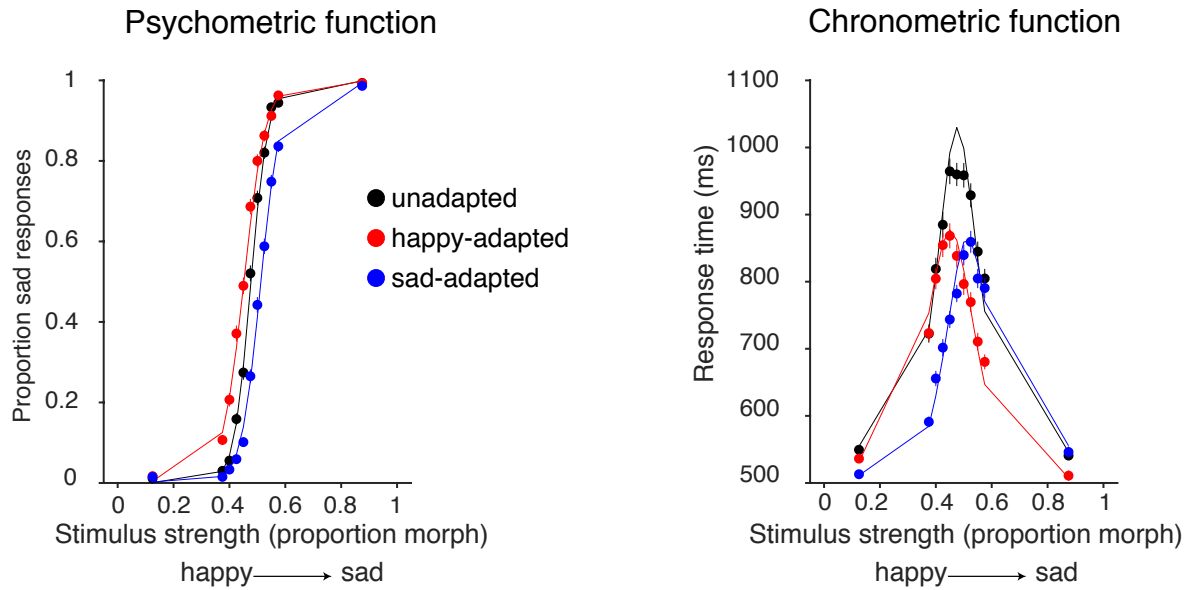

### B. Model Parameters

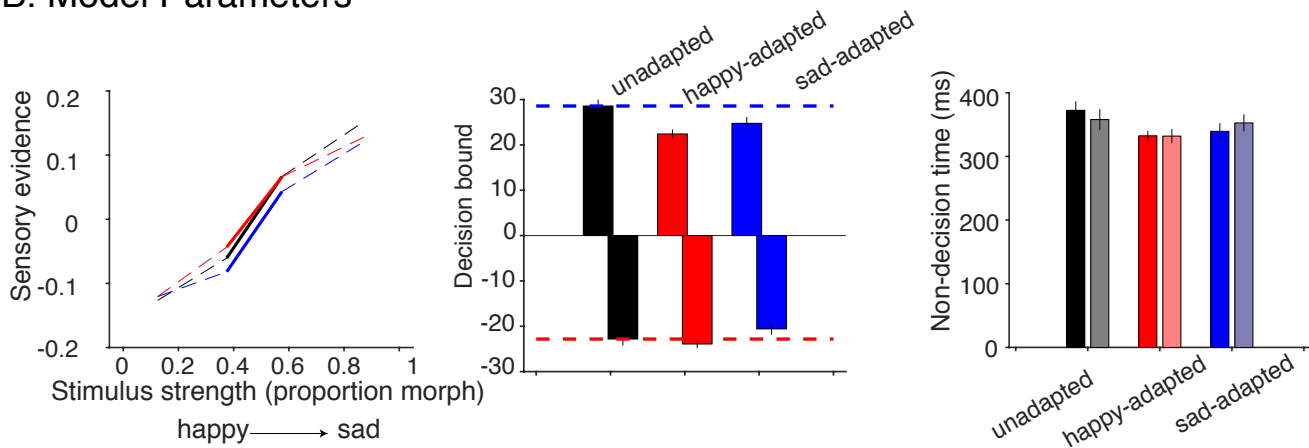

**Figure S2. Model with independent non-decision times for the two choices in Experiment 1.** All conventions are similar to Fig. 4, except that the model fits in panel A and model parameters in panel B are from a drift-diffusion model with different non-decision times for the two choices.

## Supplementary figure 3. Related to figure 6.

### A. Behavior

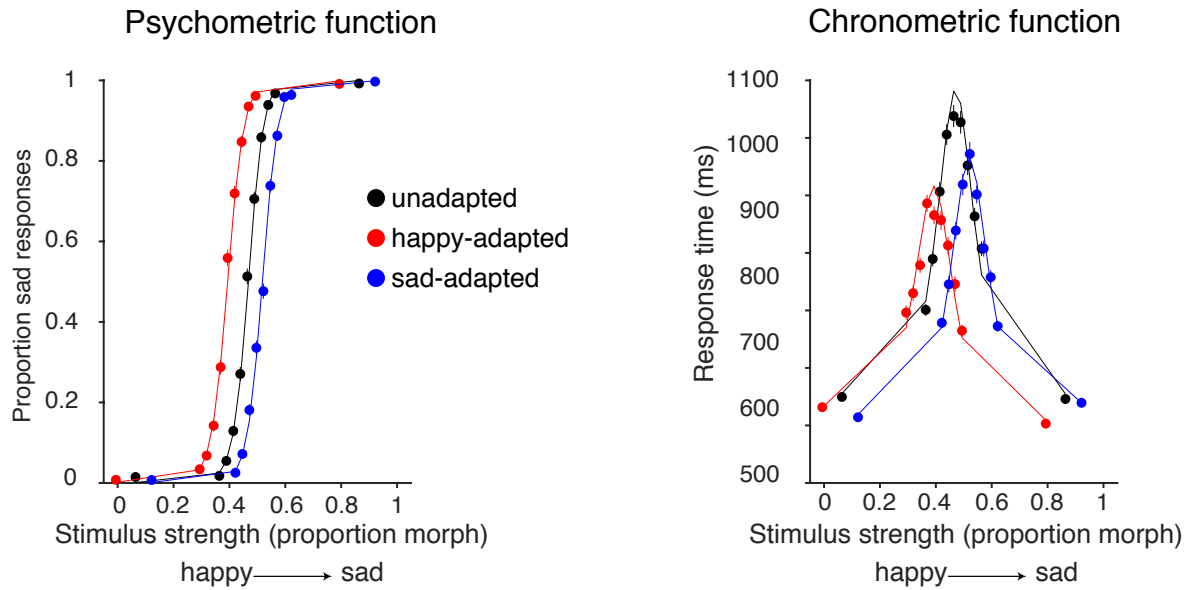

### B. Model Parameters

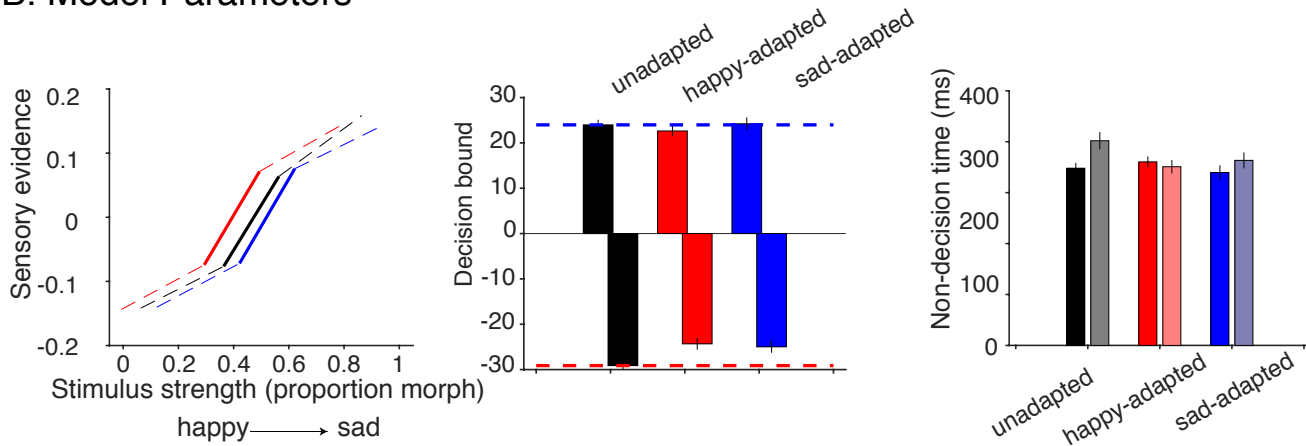

**Figure S3. Model with independent non-decision times for the two choices in Experiment 2.** All conventions are similar to Fig. 6, except that the model fits in panel A and model parameters in panel B are from a drift-diffusion model with different non-decision times for the two choices.

## Supplementary figure 4. Related to figures 4&6.

Individual participants, Expt 2 (balanced responses)

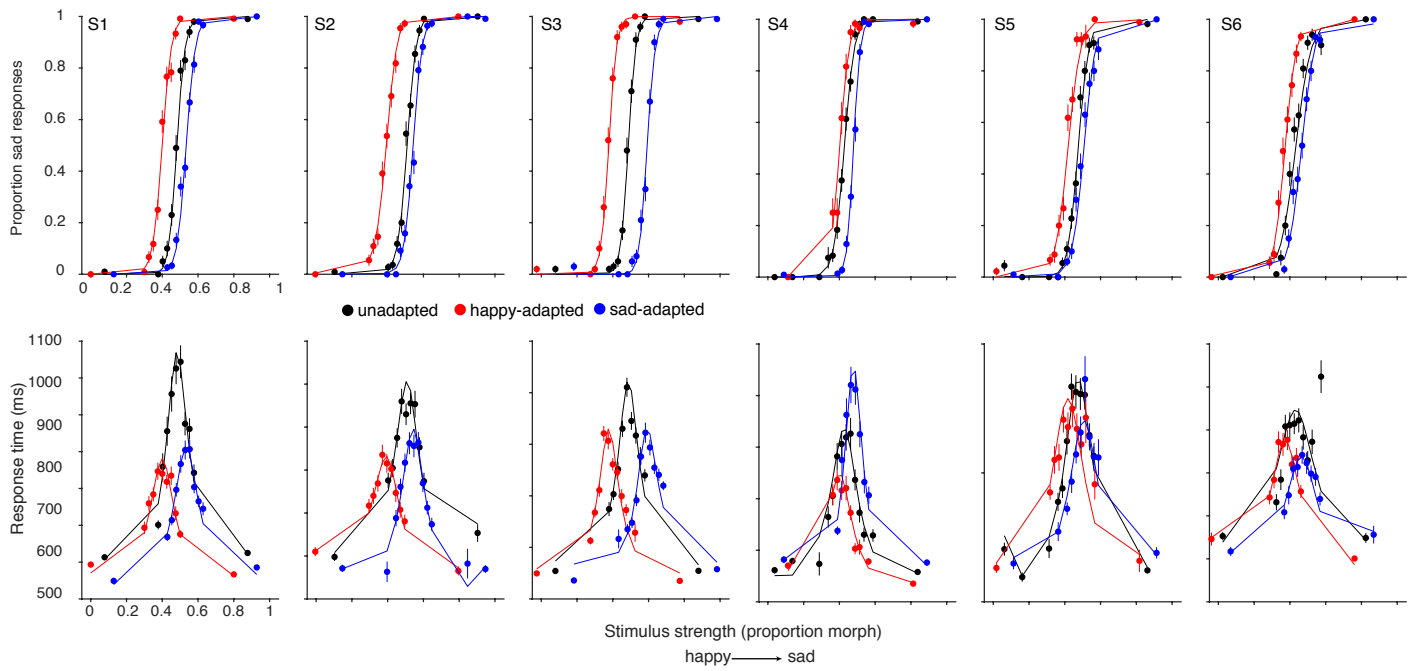

Individual participants, Expt 1 (fixed stimuli)

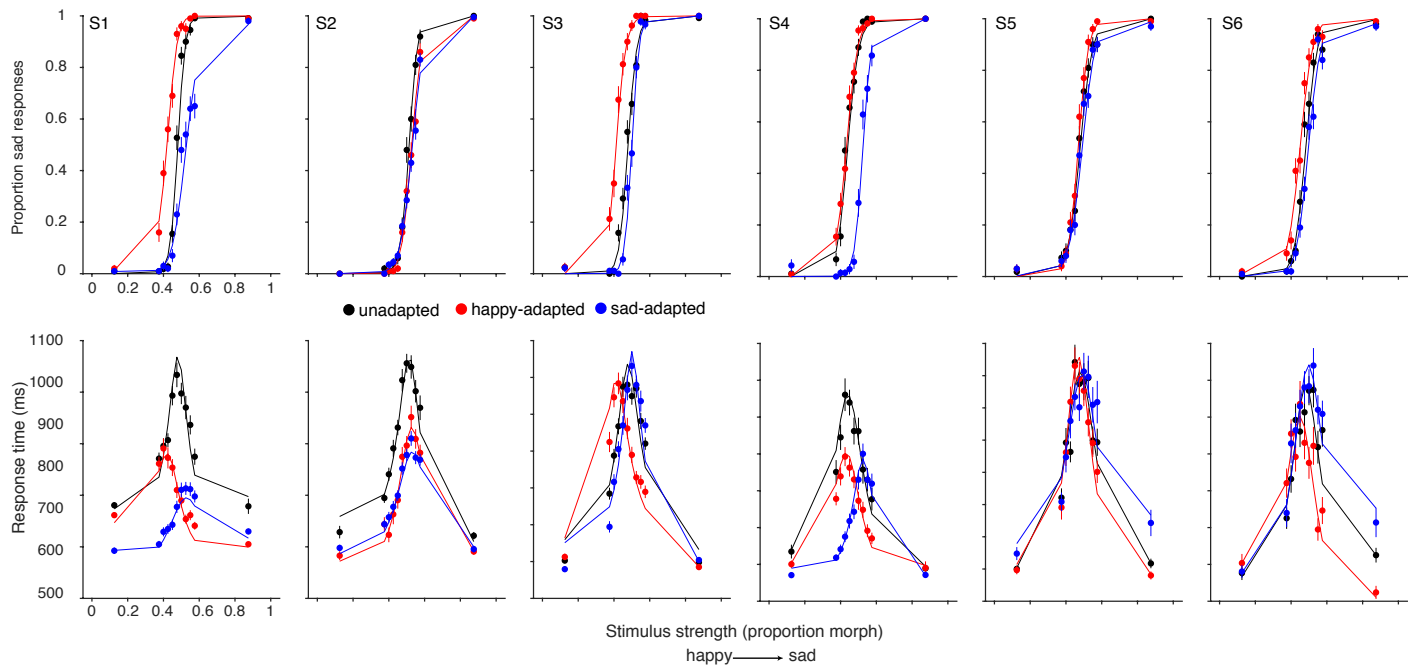

Figure S4. Individual participant data and model fits. Plots show psychometric and chronometric functions for individual participants from Experiments 1 & 2. Plotting conventions are as in Figures 4A and 6A.

**Supplementary Table 1. Related to Figure 2. Psychometric functions for each participant in each experiment and adaptation condition.**

|                                         | Participant | PSE        |               |             | Slope     |               |             |
|-----------------------------------------|-------------|------------|---------------|-------------|-----------|---------------|-------------|
|                                         |             | unadapted  | happy-adapted | sad-adapted | unadapted | happy-adapted | sad-adapted |
| <b>Experiment 1, fixed stimuli</b>      | 1           | 0.48±0.029 | 0.42±0.031    | 0.53±0.038  | 46±2.6    | 29±2.1        | 22±1.6      |
|                                         | 2           | 0.51±0.033 | 0.53±0.037    | 0.53±0.026  | 38±2.4    | 34±2.4        | 28±1.4      |
|                                         | 3           | 0.48±0.027 | 0.41±0.036    | 0.50±0.033  | 34±1.9    | 34±2.8        | 41±2.7      |
|                                         | 4           | 0.44±0.031 | 0.43±0.028    | 0.52±0.042  | 36±2.5    | 33±2.1        | 32±2.6      |
|                                         | 5           | 0.48±0.029 | 0.46±0.029    | 0.49±0.033  | 26±1.6    | 31±1.9        | 22±1.5      |
|                                         | 6           | 0.48±0.030 | 0.45±0.030    | 0.50±0.032  | 29±1.8    | 26±1.7        | 26±1.7      |
|                                         | Pooled      | 0.48±0.012 | 0.45±0.013    | 0.51±0.013  | 31±0.76   | 24±0.65       | 26±0.68     |
| <b>Experiment 2, balanced responses</b> | 1           | 0.48±0.029 | 0.40±0.023    | 0.53±0.027  | 37±2.2    | 35±2.0        | 36±1.8      |
|                                         | 2           | 0.50±0.030 | 0.40±0.023    | 0.55±0.031  | 37±2.2    | 32±1.9        | 36±2.0      |
|                                         | 3           | 0.48±0.030 | 0.37±0.023    | 0.58±0.036  | 40±2.5    | 33±2.1        | 33±2.0      |
|                                         | 4           | 0.44±0.026 | 0.41±0.040    | 0.49±0.030  | 37±2.2    | 33±3.2        | 48±2.9      |
|                                         | 5           | 0.46±0.029 | 0.42±0.029    | 0.51±0.033  | 24±1.5    | 27±1.8        | 26±1.7      |
|                                         | 6           | 0.42±0.026 | 0.36±0.024    | 0.47±0.030  | 27±1.7    | 29±1.9        | 26±1.7      |
|                                         | Pooled      | 0.46±0.012 | 0.39±0.010    | 0.52±0.012  | 33±0.81   | 32±0.84       | 33±0.79     |

**Table S1.** Point of subjective equality (PSE) and slope for each observer ± standard error from bootstrapping.
